# Supplementary figures and images for: Identifying co-occurrence and clustering of chronic diseases using latent class analysis: cross-sectional findings from SAGE South Africa Wave 2
Source: HighWire-hosted journal article supplement (doi:10.1136/bmjopen-2020-041604), 2021-01-01

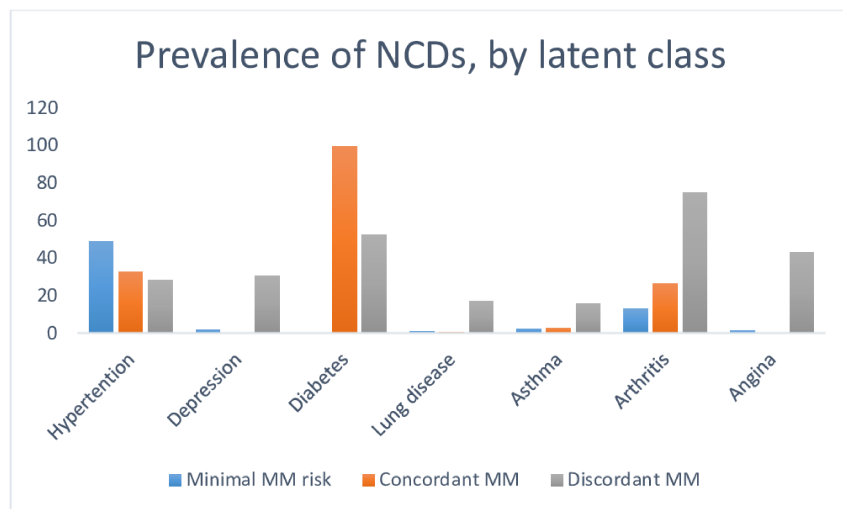

Supplement: bmjopen-2020-041604supp002_data_supplement.pdf [file bmjopen-2020-041604supp002_data_supplement.pdf]
